# Supplementary material for: A microfluidic platform enables comprehensive gene expression profiling of mouse retinal stem cells
Source: Royal Society of Chemistry journal article supplement (doi:10.1039/d1lc00790d), 2021-01-01
Supplement: d1lc00790d1.pdf [file d1lc00790d1.pdf]

Supporting Information for

## A microfluidic platform enables comprehensive gene expression profiling of mouse retinal stem cells

**Brenda L.K. Coles**<sup>1,#</sup>, **Mahmoud Labib**<sup>2,#</sup>, **Mahla Poudineh**<sup>3</sup>, **Brendan T. Innes**<sup>1</sup>, **Justin Belair-Hickey**<sup>1</sup>, **Surath Gomis**<sup>3</sup>, **Zongjie Wang**<sup>4</sup>, **Gary D. Bader**<sup>1</sup>, **Edward H. Sargent**<sup>3,\*</sup>, **Shana O. Kelley**<sup>2,4,6,\*</sup>, **Derek van der Kooy**<sup>1,5,\*</sup>

<sup>1</sup> Department of Molecular Genetics, University of Toronto, 1 King's College Circle, Toronto, ON M5S 1A8, <sup>2</sup> Department of Pharmaceutical Sciences, University of Toronto, Toronto, ON M5S 3M2, <sup>3</sup> Department of Electrical & Computer Engineering, University of Toronto, Toronto, ON M5S 1A8, <sup>4</sup> Institute for Biomaterials and Biomedical Engineering, University of Toronto, Toronto, ON M5S 3G4, <sup>5</sup> Donnely Centre, University of Toronto, 160 College Street, Toronto, ON M5S 3E1, <sup>6</sup> Department of Biochemistry, University of Toronto, Toronto, ON M5S 1A8, Canada.

\*Correspondence: ted.sargent@utoronto.ca (E.H.S.), derek.van.der.kooy@utoronto.ca (D.v.d.K.), shana.kelley@utoronto.ca (S.O.K.).

# M.L. and B.L.K.C. contributed equally to this work.

### Supporting Information – Table of Contents

|                                                                                                                                                                    | Page |
|--------------------------------------------------------------------------------------------------------------------------------------------------------------------|------|
| Figure S1. A representation of the microfluidic device used for cell capture and release and the magnetic force involved                                           | S2   |
| Figure S2. Characterization of ANF <sup>+</sup> ciliary epithelial (CE) cells populations                                                                          | S3   |
| Figure S3. Molecular characterization of the clusters.                                                                                                             | S4   |
| Figure S4. Expression analysis of <i>Abcg2</i> , <i>Notch1</i> , and <i>Fzd1</i> genes in the sequenced cells                                                      | S5   |
| Figure S5. Modified heatmap generated by scClustvis software for differentially expressed (DE) genes vs. neighbour genes for all five clusters from the t-SNE plot | S6   |
| Figure S6. Validation of the cell-surface markers identified in clusters 2 and 4                                                                                   | S7   |
| Figure S7. Validation of transcription factors identified in clusters 2 and 4                                                                                      | S8   |
| Figure S8. tSNE plot showing the reclustering analysis of RSCs-containing clusters 2 and 4                                                                         | S9   |
| References                                                                                                                                                         | S10  |

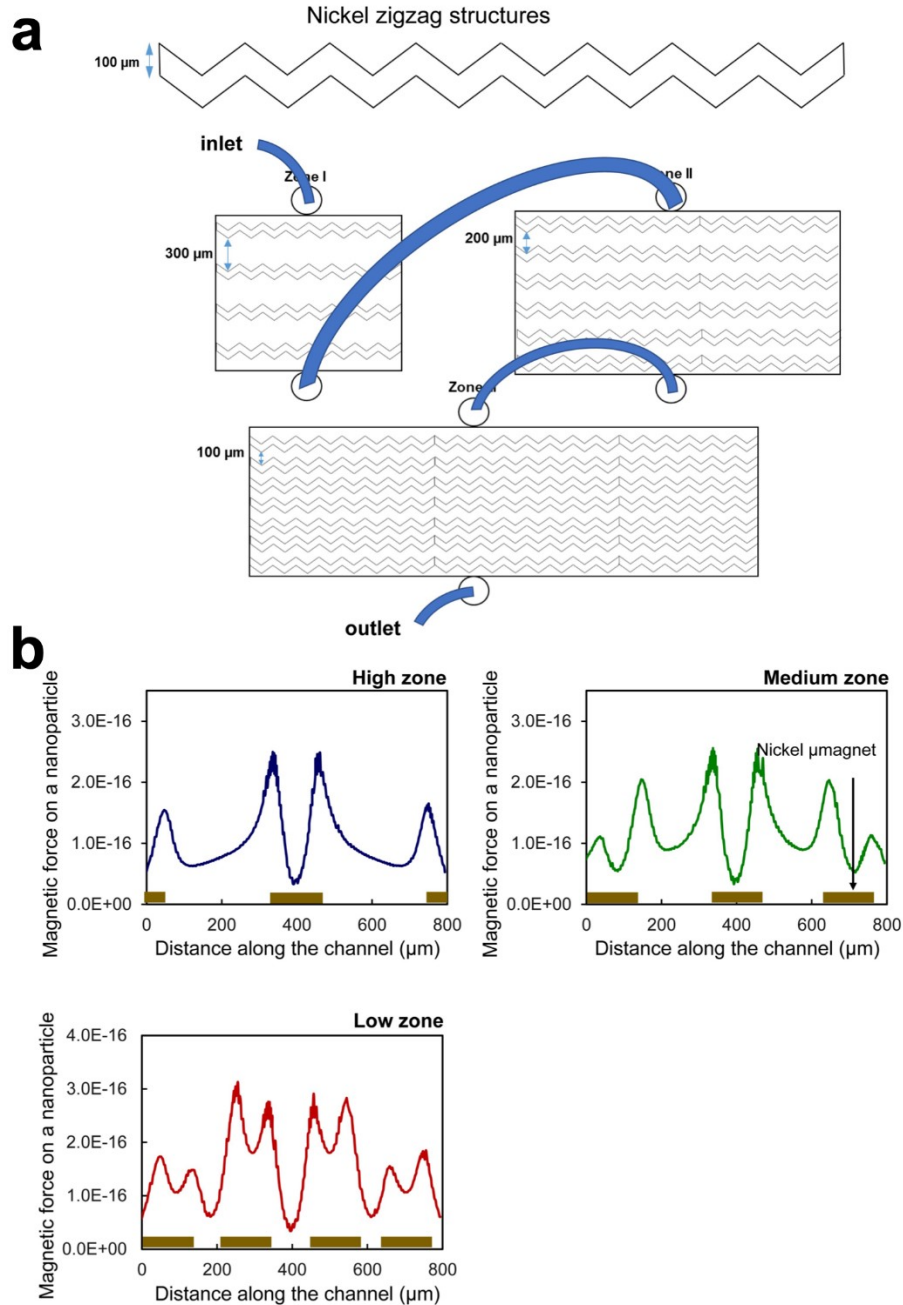

**Figure S1.** A representation of the microfluidic device used for cell capture and release and the magnetic force involved. (a) Schematic representing the microfluidic device used for retinal stem cells capture and release. The device consists of three capture zones connected via tubing. Nickel micromagnets are incorporated inside the capture zones to enhance the external magnetic field. (b) Simulation of the magnetic force acting on a single magnetic nanoparticle inside each capture zone as a function of the distance along the channel at a height of  $10\ \mu\text{m}$ . The brown boxes show the position of nickel micro-magnets. The distance between the nickel structures is  $300\ \mu\text{m}$ ,  $200\ \mu\text{m}$  and  $100\ \mu\text{m}$ , in high, medium, and low capture zones, respectively.

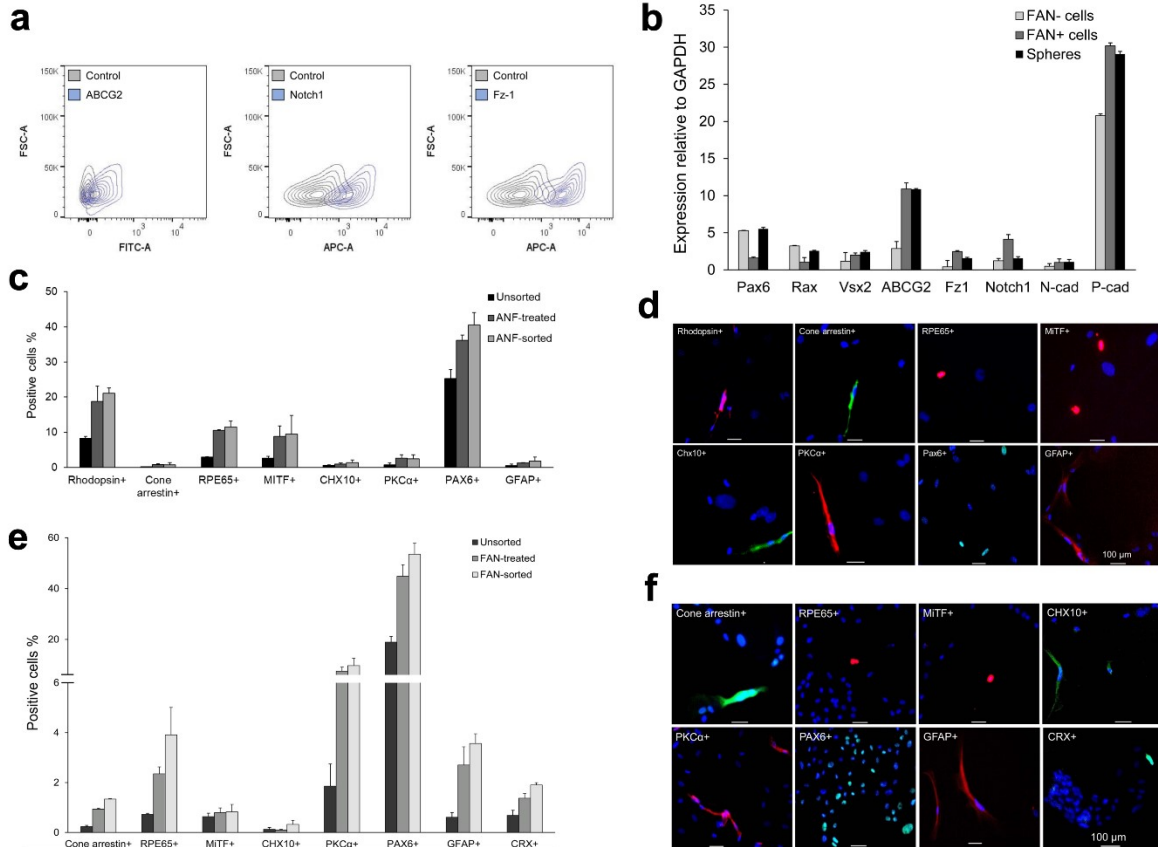

**Figure S2.** Characterization of ANF<sup>+</sup> ciliary epithelial (CE) cells populations. (a) Flow cytometric analysis of CE cells after immunostaining for ABCG2, Notch1 and Frizzled1 (Fz1). Control experiments were carried out using the isotypes. (b) RT-qPCR analysis of various retinal genes. These genes include *Abcg2*, *Notch1*, and *Fzd1* in sorted FAN<sup>+</sup>, FAN<sup>-</sup> cells and formed spheres. Expression is calculated using  $\Delta\Delta CT/RQ/FC$ . (c) Differentiation of mouse RSC spheres. Spheres isolated from unsorted/unlabeled and the enriched ABCG2<sup>+</sup>/Notch1<sup>+</sup>/Fz1<sup>+</sup> populations were cultured for 28 days under pan retinal conditions (1%FBS+FGF2 on laminin). Data are reported relative to total number of cells (DAPI<sup>+</sup>). (d) The cells were immunostained for markers specific for rod photoreceptors: rhodopsin<sup>+</sup> cells (red), cone photoreceptors: cone arrestin<sup>+</sup> cells (green), mature retinal pigmented epithelia: RPE65<sup>+</sup> cells (red), immature retinal pigmented epithelia: MiTF<sup>+</sup> (red), bipolar and progenitor cells: Chx10<sup>+</sup> cells (green), bipolar cells: PKC $\alpha$ <sup>+</sup> cells (green), amacrine and progenitors: Pax6<sup>+</sup> cells (green), Müller glia: GFAP<sup>+</sup> cells (green). Nuclei were stained with DAPI (blue). (e) Differentiation of human RSC spheres. Spheres isolated from unsorted/unlabeled and the enriched ABCG2<sup>+</sup>/Notch1<sup>+</sup>/Fz1<sup>+</sup> population were cultured for 28 days under pan retinal conditions. The cells were cultured for 40 days under pan retinal conditions (1%FBS+FGF2 on laminin). Data are reported relative to total number of cells (DAPI<sup>+</sup>). (f) Representative images of cone arrestin<sup>+</sup> cells (green), RPE65<sup>+</sup> cells (red), MiTF<sup>+</sup> cells (red), CHX10<sup>+</sup> cells (green), PKC $\alpha$ <sup>+</sup> cells (red), PAX6<sup>+</sup> cells (green), GFAP<sup>+</sup> cells (red), and CRX<sup>+</sup> cells (green). Nuclei were stained with DAPI (blue). Secondary antibodies were incubated directly with differentiated cells without primary antibodies as negative controls.

**a**

|    | Cluster '0' | Cluster '1' | Cluster '2' | Cluster '3' | Cluster '4' |
|----|-------------|-------------|-------------|-------------|-------------|
| 1  | Selenow     | Nov         | Ankrd13b    | Pr12c5      | Pvr         |
| 2  | Tmsb10      | Bbs12       | Nradd       | Olf1406     | Fam107b     |
| 3  |             | Prim1       | Btbd11      | Fam19a1     | Il15ra      |
| 4  |             | Paqr4       | Zfp518a     | Atoh1       | Ciart       |
| 5  |             | Angptl2     | Hus1        | B3gnt5      | Cftr        |
| 6  |             | Cst6        | Nov         | Slc3811     | Prr51       |
| 7  |             | Nprl3       | St6galnac4  | Ttk         | Uhrf1bp11   |
| 8  |             | Bivm        | Tmem179     | Tmem91      | Tnfrsf12a   |
| 9  |             | Pgap2       | Creld1      | Vmn1r13     | Zbtb10      |
| 10 |             | Gchfr       | Pecr        | Dnah3       | Gdf15       |

**b**

| ScRNA Seq: Transcription Factors |                |             |
|----------------------------------|----------------|-------------|
|                                  | Cluster '2'    | Cluster '4' |
| 1                                | NRF            | ATF4        |
| 2                                | KLF13          | SMAD4       |
| 3                                | CREB1          | PLAU        |
| 4                                | Crx (Otx3)     | HIVEP1      |
| 5                                | Elk1           | NFKB1       |
| 6                                | HIF1A          | MAX         |
| 7                                | MyoD1 (Myf3)   | NR5A2       |
| 8                                | SERBF1         | REPIN1      |
| 9                                | ZBTB7A         | RELA        |
| 10                               | SRF            | SND1        |
| 11                               | SIRT3          | CLOCK       |
| 12                               | KLF1           | NRF1        |
| 13                               | XrccA          | SIN3A       |
| 14                               | AIRE           | TP53 (P53)  |
| 15                               | POLE           | EP300       |
| 16                               | EPAS1          | TPAP2C      |
| 17                               | Notch1         | NCOR1       |
| 18                               | CCNE1 (Cyclin) | STAT5B      |
| 19                               |                | STAT6       |

**c**

| Molecular signature of Non-RSC containing clusters  |        |         |          |         |
|-----------------------------------------------------|--------|---------|----------|---------|
| Cluster 0: Potentially Trabecular Meshwork          |        |         |          |         |
| Col17a1                                             | Tmsb10 | Selenow | Krt5     | Krt12   |
| Apod                                                | Tgfb1  | Bbs12   | Aldh3a1  |         |
| Cluster 1: Potentially Pigmented Ciliary Epithelium |        |         |          |         |
| Tyr                                                 | Bbs12  | Nov     | Serpinf1 |         |
| Cluster 3: Potentially Corneal/Limbal cells         |        |         |          |         |
| Olf1406                                             | Piezo2 | Hoxa9   | Krt27    | Vmn1r13 |
| Slc38a11                                            | Mki67  | Krt5    | Aldh3a1  | Krt12   |
| Pkp1                                                |        |         |          |         |

**Figure S3.** Molecular characterization of the clusters. (a) Top 10 differentially expressed (DE) genes in each cluster. Wilcoxon rank-sum tests with false detection rate correction were used. Cluster '0' only has two DE marker genes. Colors correspond to tSNE plot cluster colors. (b) Enrichr analysis of RSCs-containing cluster 2 vs. cluster 4 showing the 19 most differentially expressed transcription factors based on gene expression. The yellow highlighted TFs are obtained from the Transfac & Jaspar position weight matrix (PWM) analysis and the blue highlighted TFs are obtained from protein-protein interaction (TF-PPI), the green highlighted TF was highly expressed in both the PWM and PPI analysis.<sup>1</sup> (c) Molecular signatures obtained from published papers and suggesting the identity of the 3 non-RSC clusters. None of the clusters fall perfectly into any category but do have higher expression of specific genes that are known to be enriched in trabecular meshwork, pigmented ciliary epithelium and the corneal/limbal region of the eye.<sup>2-4</sup>

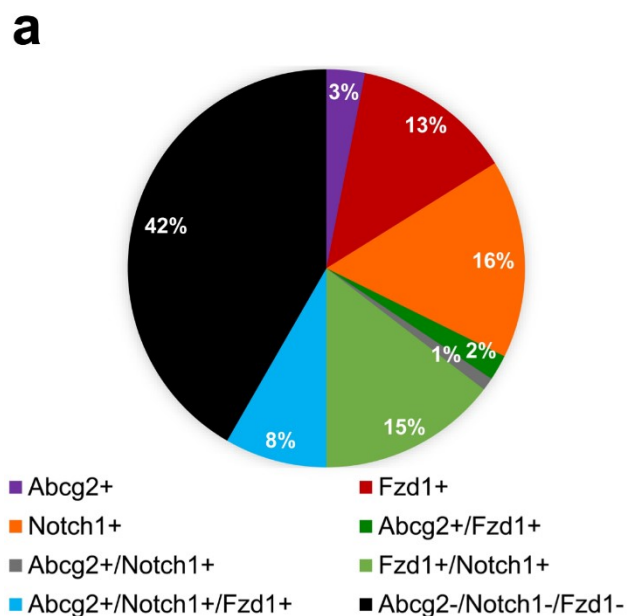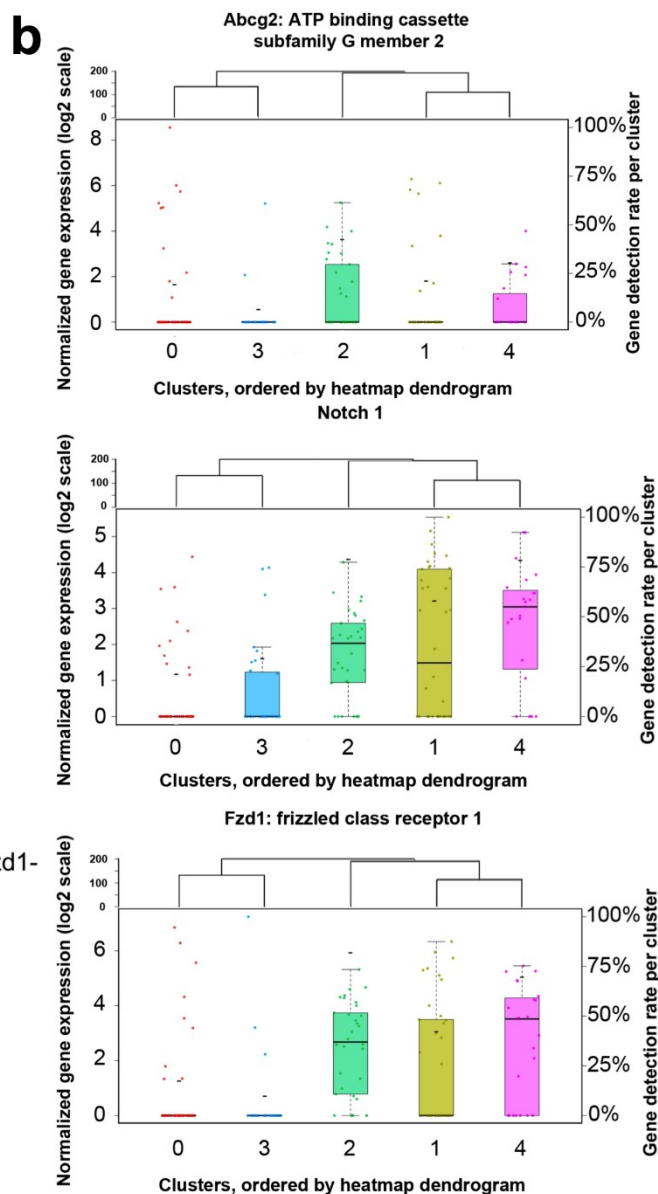

**Figure S4.** Expression analysis of *Abcg2*, *Notch1*, and *Fzd1* genes in the sequenced cells. (a) The genes were expressed in 58% of the cells. A subset of the sorted cells was plated for clonal sphere assay and 50% of the cells were able to form spheres. These data indicate that the RSCs express either one, two or a combination of all three markers. (b) Box plots showing interquartile range of *Abcg2*, *Notch1*, and *Fzd1* gene expression across clusters. Dots indicate normalized gene expression per cell, and the black dash indicates the proportion of cells in each cluster.

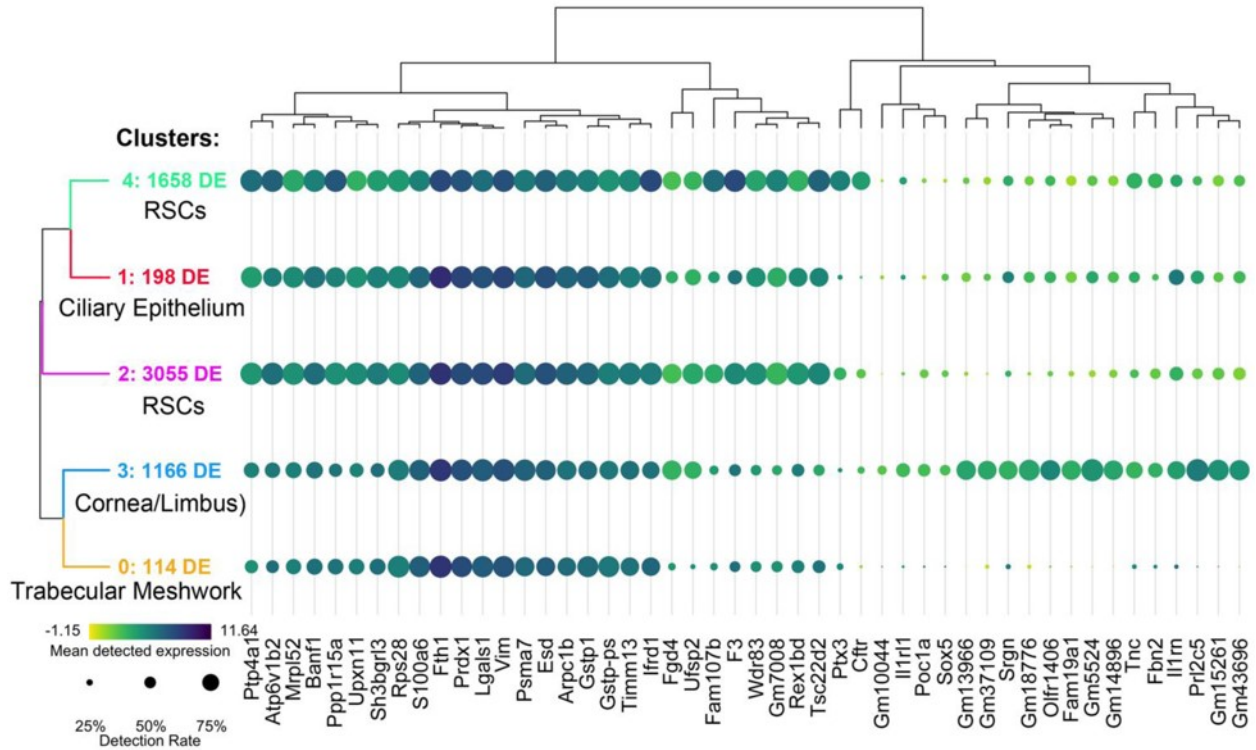

**Figure S5.** Modified heatmap generated by scClustvis software for differentially expressed (DE) genes vs. neighbour genes for all five clusters. This shows the top 10 genes that are most positively DE per cluster compared to their nearest neighbour. Wilcoxon rank-sum tests with false detection rate correction were used. The dot diameter indicates the number of cells within the cluster that are expressing that specific gene and the dot colors reflect the average normalized gene expression in the cells harboring the gene (i.e. the larger the dot, the more cells expressing the gene and the darker the dot, the higher the gene expression in those cells).



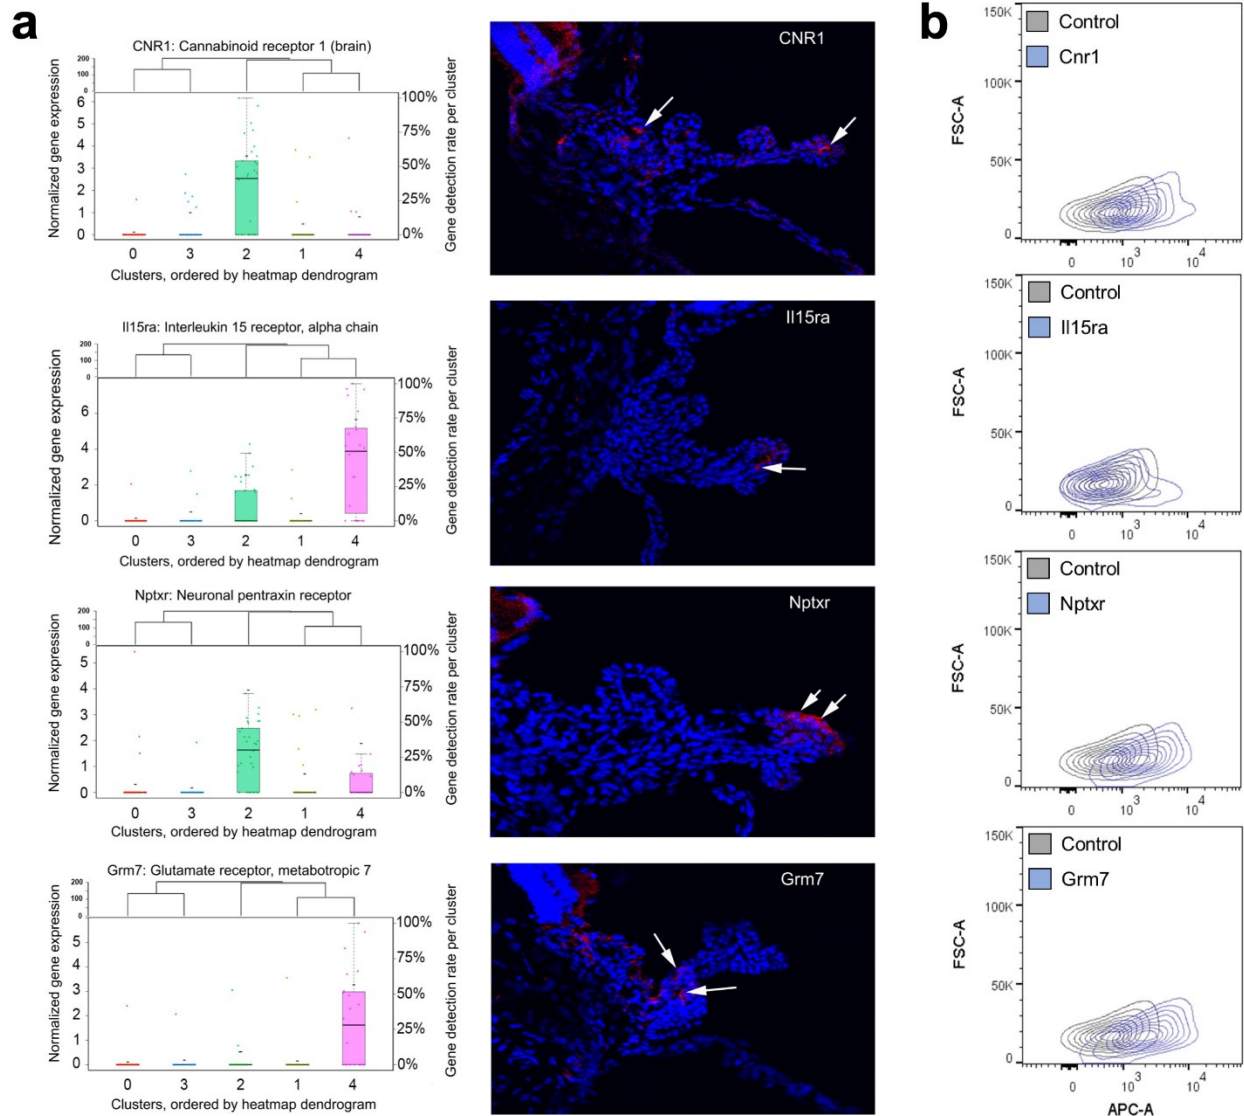

**Figure S6.** Validation of the cell-surface markers identified in clusters 2 and 4. (a) Box plots and images showing the expression of four novel cell-surface markers identified in clusters 2 and 4. *CNR1* is almost exclusively expressed in cluster 2 of RSCs. *Grm7* is almost exclusively expressed in cluster 4 of RSCs. *Il15ra* and *Nptxr* are almost exclusively expressed in clusters 2 and 4 of RSCs. Each box plot shows interquartile range of the gene expression across clusters, with dots indicating normalized gene expression per cell, and the black dash indicating the proportion of cells in each cluster. Fluorescence images of CE cells immunostained with antibodies specific for Cnr1, Il15ra, Nptxr, and Grm7. (b) Flow cytometric analysis of CE cells after immunostaining for Cnr1, Il15ra, Nptxr, and Grm7. Dissociated CE cells were incubated with primary antibodies specific to either Cnr1, Il15ra, Nptxr, and Grm7, followed by incubation with APC-streptavidin. Control experiments were carried out in which the cells were incubated first with biotin-labeled rabbit isotype control followed by incubation with APC-streptavidin.

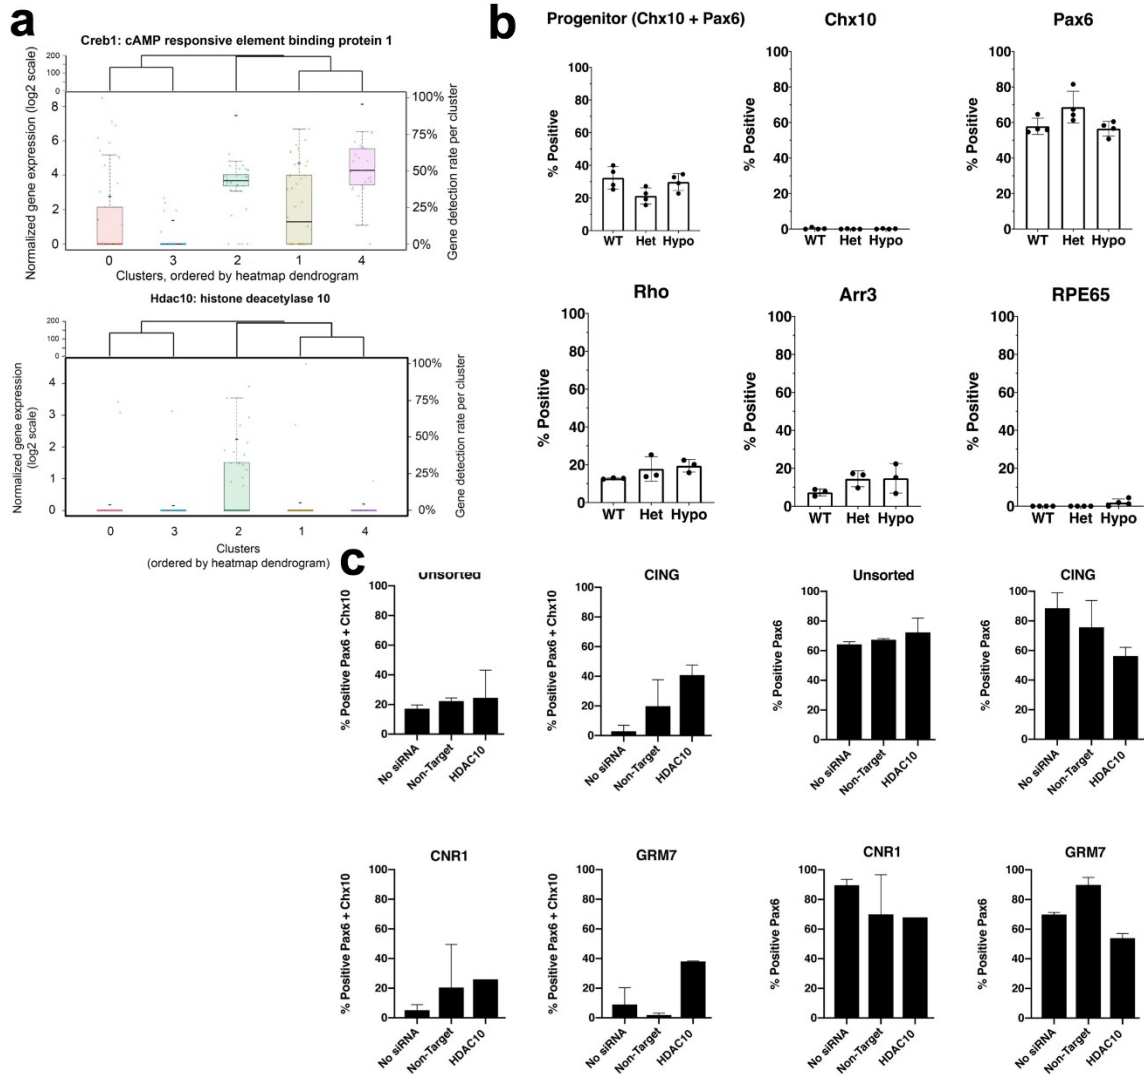

**Figure S7.** Validation of transcription factors identified in clusters 2 and 4. (a) Box plots showing the expression of two novel transcription factors identified in clusters 2 and 4. *Creb1* is expressed in both clusters 2 & 4 but has more downstream target genes expressed in cluster 2. *Hdac10* is almost exclusively expressed in cluster 2. (b) *Creb1* mouse RSC sphere differentiation. Pan-retinal differentiation of RSC spheres derived from adult *Creb1* wild-type (WT), heterozygous hypomorphic (Het) and homozygous hypomorphic (Hypo) mice. There are no differences across the genotypes in their differentiation into progenitors/RSC (Pax6<sup>+</sup>/Chx10<sup>+</sup>), bipolar cells (Chx10<sup>+</sup>), amacrine cells (Pax6<sup>+</sup>), rod photoreceptors (Rho<sup>+</sup>), cone photoreceptors (Arr3<sup>+</sup>) or retinal pigmented epithelia (RPE65<sup>+</sup>). (c) siRNA treated RSC sphere differentiation. Pan-retinal differentiation of RSC spheres derived from adult CD1 mice sorted by targeting *Cnr1*, *Grm7* and CING (Cnr1<sup>+</sup>/Grm7<sup>+</sup>/Il15ra<sup>+</sup>/Nptxr<sup>+</sup>) and differentiated in pan-retinal medium in the presence of either SFM, control NT siRNA or *Hdac10* siRNA (Cluster 2 TF). There were no significant differences observed across the groups in the differentiation into progenitors/RSC (Pax6<sup>+</sup>/Chx10<sup>+</sup>) or amacrine cells (Pax6<sup>+</sup> alone). There were no Chx10<sup>+</sup>/Pax6<sup>-</sup> cells observed, suggesting that there were no bipolar cells differentiating under any condition (not shown).



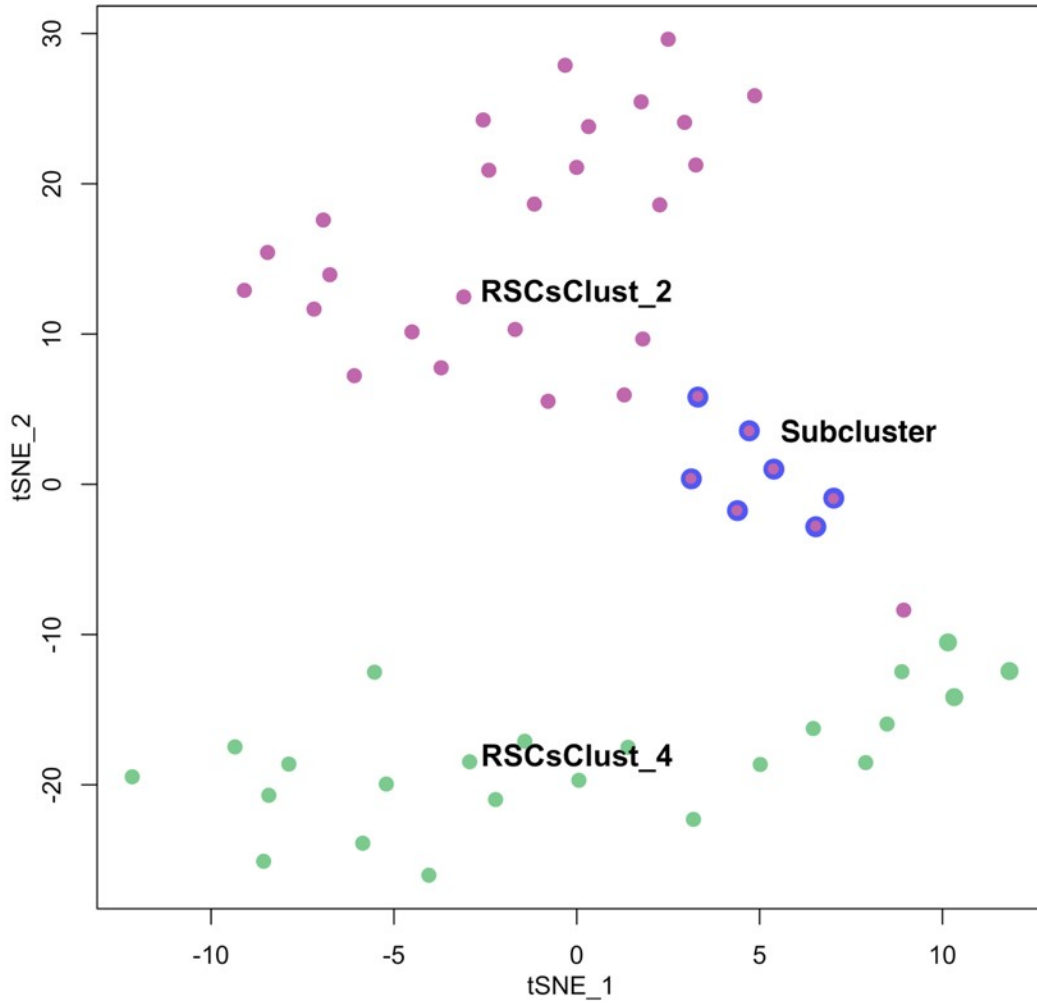

**Figure S8.** tSNE plot showing the reclustering analysis of RSCs-containing clusters 2 and 4. The purple dots represent the cells previously identified as cluster 2, the green dots represent the cells previously identified as cluster 4 and the pink dots with blue rings in the middle represent the newly identified cluster, which is identified based on genes with significant differential gene expression compared to either previously identified clusters.

## References

- 1 M. V. Kuleshov, M. R. Jones, A. D. Rouillard, N. F. Fernandez, Q. Duan, Z. Wang, S. Koplev, S. L. Jenkins, K. M. Jagodnik, A. Lachmann, M. G. McDermott, C. D. Monteiro, G. W. Gundersen and A. Ma'ayan, *Nucleic Acids Res.*, 2016, **44**, W90-97.
- 2 F. Bian, W. Liu, K. C. Yoon, R. Lu, N. Zhou, P. Ma, S. C. Pflugfelder and D. Q. Li, *Int. J. Biochem. Cell Biol.*, 2010, **42**, 1142-1153.
- 3 S. F. Janssen, T. G. Gorgels, K. Bossers, J. B. Ten Brink, A. H. Essing, M. Nagtegaal, P. J. van der Spek, N. M. Jansonius and A. A. Bergen, *PLoS One*, 2012, **7**, e44973.
- 4 J. A. Vranka, J. M. Bradley, Y. F. Yang, K. E. Keller and T. S. Acott, *PLoS One*, 2015, **10**, e0122483.
